# Supplementary material for: Dissecting the inheritance pattern of anemone type and the relevant floral traits of chrysanthemum in multiple segregating F1 populations
Source: Research Square preprint supplement (doi:10.21203/rs.3.rs-1616126/v1), 2022-05-31
Supplement: Supplementary file 1 [file ebf83a7aeb89de50f25d9278.docx]

Table S1 Estimates of genetic distances based on phenotypic (upper diagonal) and single nucleotide polymorphism (SNPs) (lower diagonal) data for all pairwise combinations of seven parental genotypes

| Parent | QX021 | QX081 | QX096 | QX097 | QX098 | Nannong Xufeng | Monalisa |
| --- | --- | --- | --- | --- | --- | --- | --- |
| QX021 | 1 | 0.11 | 0.41 | 0.26 | 0.01 | 0.52 | 1.00 |
| QX081 | 0.42 | 1 | 0.12 | 0.02 | 0.04 | 0.43 | 0.89 |
| QX096 | 0.45 | 0.44 | 1 | 0.00 | 0.28 | 0.44 | 0.83 |
| QX097 | 0.46 | 0.46 | 0.37 | 1 | 0.12 | 0.43 | 0.86 |
| QX098 | 0.45 | 0.46 | 0.40 | 0.38 | 1 | 0.43 | 0.92 |
| Nannong Xufeng | 0.44 | 0.35 | 0.46 | 0.47 | 0.46 | 1 | 0.35 |
| Monalisa | 0.47 | 0.43 | 0.42 | 0.44 | 0.44 | 0.44 | 1 |
